# Supplementary material for: Short-Term Dynamics of Bacterial Community Structure in Restored Abandoned Agricultural Soils under Semi-Arid Conditions
Source: MDPI journal article supplement (doi:10.3390/agronomy13010086), 2022-12-27
Supplement: s1 [file s1]

**Figure S1.** Bacterial community at phylum level with a relative abundance  $\geq 0.1\%$ .

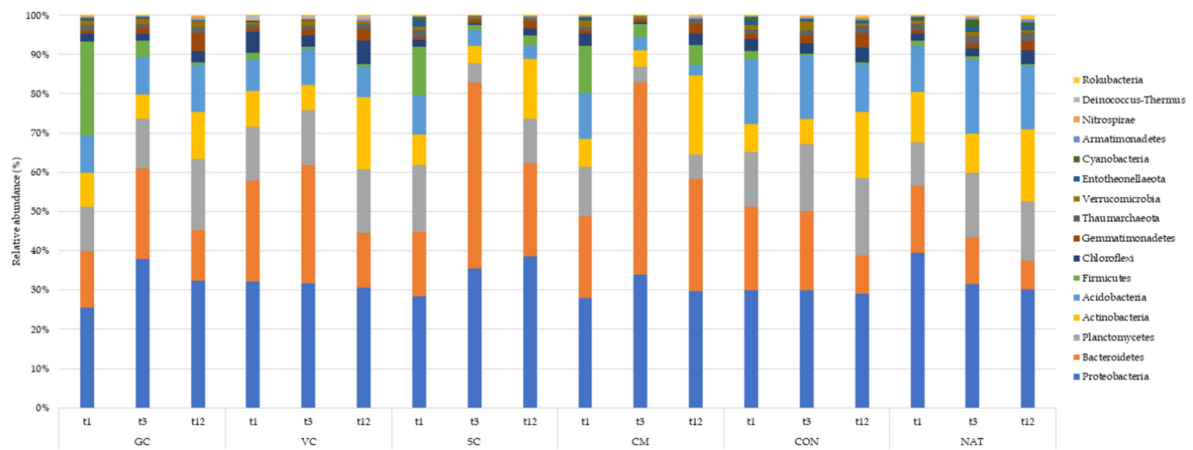

*Footnotes:* GC: greenhouse crop residues compost; VC: vermicompost; SC: organic compost derived from the mixture of chicken and sheep manure; CM: manure from chickens raised on the soil of organic farms; CON: unamended control soils; NAT: natural reference soil. t1: initial soil sampling; t3: soil sampling at 3 months; t12: soil sampling at 12 months.

**Table S1.** Results of different multivariate PERMANOVA analysis ( $p < 0.05$ ; 999 perm) by the factors treatment (GC, VC, SC, CM CON and NAT soils) and time (t1, t3 and t12) for the data of soil physico-chemical properties and bacterial composition (phylum level and genus or the next upper taxonomic level identified).

**a) Physico-chemical soil properties:**

| Factor           | DF | SS       | MS       | F-Value | P-Value |
|------------------|----|----------|----------|---------|---------|
| Treatment        | 5  | 4.63E+05 | 9,26E+05 | 43,882  | 0,001   |
| Time             | 2  | 5.91E+05 | 2,95E+05 | 13,996  | 0,001   |
| Treatment x Time | 10 | 3,02E+0  | 30257    | 1,433   | 0,194   |
| Residual         | 36 | 7,60E+05 | 21112    |         |         |
| Total            | 53 | 6,29E+06 |          |         |         |

**b) Soil bacterial community at phylum level:**

| Factor           | DF | SS     | MS     | F-Value | P-Value |
|------------------|----|--------|--------|---------|---------|
| Treatment        | 5  | 3758,1 | 751,62 | 10,432  | 0,001   |
| Time             | 2  | 2030,5 | 1015,2 | 14,091  | 0,001   |
| Treatment x Time | 10 | 2309,6 | 230,96 | 3,2055  | 0,001   |
| Residual         | 36 | 2593,8 | 72,051 |         |         |
| Total            | 53 | 10692  |        |         |         |

**c) Soil bacterial community at genus or the next upper taxonomic level identified:**

| Factor           | DF | SS     | MS     | F-Value | P-Value |
|------------------|----|--------|--------|---------|---------|
| Treatment        | 5  | 9452,4 | 1890,5 | 6,1747  | 0,001   |
| Time             | 2  | 5395,8 | 2697,9 | 8,8118  | 0,001   |
| Treatment x Time | 10 | 6318,4 | 631,84 | 2,0637  | 0,001   |
| Residual         | 36 | 11022  | 306,17 |         |         |
| Total            | 53 | 32189  |        |         |         |

**Table S2.** Component loadings on all principal-component-analysis (PCA) solution for physico-chemical soil properties and nutrient stoichiometry ratios in restored, natural and control soils.

| Variable | PC1    | PC2    | PC3    | PC4    | PC5    |
|----------|--------|--------|--------|--------|--------|
| EC       | 0.373  | -0.154 | -0.389 | 0.081  | -0.393 |
| pH       | -0.211 | 0.19   | 0.677  | 0.12   | -0.048 |
| TOC      | -0.082 | -0.629 | 0.144  | 0.118  | -0.164 |
| TN       | 0.15   | -0.596 | -0.024 | -0.005 | 0.101  |
| AP       | 0.371  | -0.185 | 0.252  | 0.389  | 0.653  |
| C:N      | -0.369 | -0.282 | 0.272  | 0.206  | -0.43  |
| C:P      | -0.459 | -0.049 | -0.326 | 0.324  | 0.2    |
| N:P      | -0.447 | 0.02   | -0.354 | 0.341  | 0.212  |
| AW       | -0.322 | -0.27  | -0.007 | -0.742 | 0.33   |

EC: electrical conductivity; TOC: total organic carbon; TN: total nitrogen; AP: assimilable phosphorus; C:N: carbon to nitrogen ratio; C:P: carbon to phosphorus ratio; N:P: nitrogen to phosphorus ratio; AW: available plant water. CG: greenhouse crop residues compost; VC: vermicompost; CS: organic compost derived from the mixture of chicken and sheep manure; CM: manure from chickens raised on the soil of organic farms; CON: unamended control soils; NAT: natural reference soil.

**Table S3.** Distance-based redundancy analysis results, explanatory variance and contribution of relative abundance of bacterial taxa and abiotic properties (physico-chemical properties and nutrient stoichiometry) of the soil.

|                                                                                                     |            |                |      |
|-----------------------------------------------------------------------------------------------------|------------|----------------|------|
| AICc                                                                                                | 345.14     | R <sup>2</sup> | 0.37 |
| Percentage of variation explained by individual axes (% explained variation out of total variation) |            |                |      |
| Axis                                                                                                | Individual | Cumulative     |      |
| 1                                                                                                   | 21.87      | 21.87          |      |
| 2                                                                                                   | 5.16       | 27.03          |      |
| <u>Weights</u>                                                                                      |            |                |      |
| (Coefficients for linear combinations of X's in the formation of dbRDA coordinates)                 |            |                |      |
| Variable                                                                                            | dbRDA1     | dbRDA2         |      |
| EC                                                                                                  | -0,64      | 4,06           |      |
| pH                                                                                                  | -1,40      | 0,59           |      |
| TOC                                                                                                 | -1,33      | 36,82          |      |
| TN                                                                                                  | 1,07       | -32,13         |      |
| AP                                                                                                  | -16,90     | -3,70          |      |
| C:N                                                                                                 | 22,32      | -19,30         |      |
| C:P                                                                                                 | -220,04    | -6,19          |      |
| N:P                                                                                                 | 183,50     | 5,25           |      |
| AW                                                                                                  | 2,49       | 1,59           |      |

EC: electrical conductivity; TOC: total organic carbon; TN: total nitrogen; AP: assimilable phosphorus; C:N: carbon to nitrogen ratio; C:P: carbon to phosphorus ratio; N:P: nitrogen to phosphorus ratio; AW: available plant water.

**Table S4.** Results of the analysis of indicator species at the phylum and genus or the next upper taxonomic level identified for each type of restored, control and natural reference soil.

| Treatment | Phylum              | Soil Bacterial taxa                       | Indicator value | p-value | Sig. |
|-----------|---------------------|-------------------------------------------|-----------------|---------|------|
| GC        | Firmicutes          | g_Staphylococcus                          | 0.674           | 0.0001  | ***  |
| GC        | Firmicutes          | f_Bacillaceae                             | 0.506           | 0.0046  | **   |
| GC        | Proteobacteria      | f_Blrii41_g_uncultured                    | 0.414           | 0.0410  | *    |
| GC        | Proteobacteria      | g_Halomonas                               | 0.455           | 0.0185  | *    |
| GC        | Proteobacteria      | g_Arenimonas                              | 0.454           | 0.0187  | *    |
| VC        | Bacteroidetes       | g_Chryseolinea                            | 0.663           | 0.0001  | ***  |
| VC        | Bacteroidetes       | g_Alistipes                               | 0.509           | 0.0034  | **   |
| VC        | Bacteroidetes       | f_Flavobacteriaceae                       | 0.410           | 0.0056  | **   |
| VC        | Deinococcus-Thermus | g_Truepera                                | 0.776           | 0.0001  | ***  |
| VC        | Chloroflexi         | o_SBR1031_g_anaerobic bacterium MO-CFX2   | 0.834           | 0.0001  | ***  |
| VC        | Chloroflexi         | o_Ardenticatenales_g_bacterium YC-LK-LKJ3 | 0.895           | 0.0001  | ***  |
| VC        | Proteobacteria      | f_Xanthomonadaceae                        | 0.810           | 0.0001  | ***  |
| CM        | Actinobacteria      | g_Arthrobacter                            | 0.526           | 0.0008  | ***  |
| CM        | Actinobacteria      | g_Leifsonia                               | 0.524           | 0.0011  | **   |
| CM        | Bacteroidetes       | g_Sphingobacterium                        | 0.495           | 0.0050  | **   |
| CM        | Bacteroidetes       | g_Pontibacter                             | 0.623           | 0.0003  | ***  |
| CM        | Bacteroidetes       | g_Myroides                                | 0.430           | 0.0419  | *    |
| CM        | Firmicutes          | g_Atopostipes                             | 0.550           | 0.0010  | ***  |
| CM        | Firmicutes          | o_Bacillales                              | 0.627           | 0.0001  | ***  |
| CM        | Proteobacteria      | g_Alcaligenes                             | 0.579           | 0.0008  | ***  |
| CM        | Proteobacteria      | g_Stenotrophomonas                        | 0.477           | 0.0148  | *    |
| CM        | Proteobacteria      | g_Nitrosospira                            | 0.618           | 0.0004  | ***  |
| SC        | Bacteroidetes       | g_Flavobacterium                          | 0.507           | 0.0054  | **   |
| SC        | Proteobacteria      | g_Cellvibrio                              | 0.503           | 0.0054  | **   |
| SC        | Proteobacteria      | g_Phenylobacterium                        | 0.401           | 0.0089  | **   |
| CON       | Acidobacteria       | c_Subgroup 6_o_unknown_f_unknown          | 0.500           | 0.0008  | ***  |
| CON       | Actinobacteria      | p_Actinobacteria_g_uncultured             | 0.446           | 0.0164  | *    |
| CON       | Bacteroidetes       | f_Microscillaceae                         | 0.491           | 0.0013  | **   |
| CON       | Bacteroidetes       | g_Parasegetibacter                        | 0.541           | 0.0009  | ***  |
| CON       | Chloroflexi         | f_Anaerolineaceae_g_UTCFX1                | 0.584           | 0.0003  | ***  |
| NAT       | Acidobacteria       | f_Pyrinomonadaceae_g_RB41                 | 0.890           | 0.0001  | ***  |
| NAT       | Acidobacteria       | f_Blastocatellaceae                       | 0.617           | 0.0001  | ***  |
| NAT       | Acidobacteria       | o_Subgroup 7_g_uncultured                 | 0.667           | 0.0001  | ***  |
| NAT       | Actinobacteria      | o_Gaiellales_f_uncultured_g_uncultured    | 0.449           | 0.0156  | *    |
| NAT       | Actinobacteria      | g_Blastococcus                            | 0.602           | 0.0001  | ***  |
| NAT       | Actinobacteria      | o_Gaiellales_f_uncultured                 | 0.841           | 0.0001  | ***  |
| NAT       | Actinobacteria      | g_Solirubrobacter                         | 0.793           | 0.0001  | ***  |
| NAT       | Actinobacteria      | g_Parviterribacter                        | 0.516           | 0.0020  | **   |
| NAT       | Actinobacteria      | g_Rubrobacteria                           | 0.650           | 0.0001  | ***  |
| NAT       | Bacteroidetes       | g_Segetibacter                            | 0.417           | 0.0378  | *    |
| NAT       | Chloroflexi         | f_JG30-KF-CM45_g_uncultured               | 0.579           | 0.0004  | ***  |
| NAT       | Cyanobacteria       | g_Tychonema CCAP 1459-11B                 | 0.535           | 0.0020  | **   |
| NAT       | Planctomycetes      | g_Zavarzinella                            | 0.672           | 0.0001  | ***  |
| NAT       | Proteobacteria      | f_Beijerinckiaceae                        | 0.922           | 0.0001  | ***  |
| NAT       | Proteobacteria      | f_Archangiaceae                           | 0.443           | 0.0168  | *    |
| NAT       | Proteobacteria      | g_Psychroglaciecola                       | 0.811           | 0.0001  | ***  |
| NAT       | Proteobacteria      | g_PMMR1                                   | 0.861           | 0.0001  | ***  |

|     |                |                                         |       |        |     |
|-----|----------------|-----------------------------------------|-------|--------|-----|
| NAT | Proteobacteria | g_Reyranella                            | 0.631 | 0.0002 | *** |
| NAT | Proteobacteria | o_Elsterales_f_uncultured_g_uncultured  | 0.768 | 0.0001 | *** |
| NAT | Proteobacteria | g_Rhodoplanes                           | 0.694 | 0.0001 | *** |
| NAT | Proteobacteria | o_Rhizobiales_f_uncultured_g_uncultured | 0.813 | 0.0001 | *** |
| NAT | Proteobacteria | o_Betaproteobacteriales_f_TRA3-20       | 0.883 | 0.0001 | *** |
| NAT | Proteobacteria | g_Ellin6067                             | 0.706 | 0.0001 | *** |

---

GC: greenhouse crop residues compost; VC: vermicompost; SC: organic compost derived from the mixture of chicken and sheep manure; CM: manure from chickens raised on the soil of organic farms; CON: unamended control soils; NAT: natural reference soil. Signif. codes: 0 '\*\*\*' 0.001 '\*\*' 0.01 '\*' 0.05 '.' 0.1 ' ' 1
